# Supplementary material for: Characterization of multi-resistant Shigella species isolated from raw cow milk and milk products
Source: PubMed Central journal article supplement — J Vet Med Sci. 2022 May 6;84(7):890–7. doi: 10.1292/jvms.22-0018 (PMC9353095; doi:10.1292/jvms.22-0018), 2022-05-06
Supplement: jvms-84-890-s001.pdf [file jvms-84-890-s001.pdf]

**Supplementary Table 1** Characteristic features of *Shigella* species under study (n=42).

| Strain ID | Species(No.)              | Resistance phenotype             | Resistance genotype |                  |                  |                |               |            | Plasmid pattern | Plasmids (kb)          | Type &Source   |
|-----------|---------------------------|----------------------------------|---------------------|------------------|------------------|----------------|---------------|------------|-----------------|------------------------|----------------|
|           |                           |                                  | ESBL                |                  |                  |                | <i>Tet(A)</i> | <i>Qac</i> |                 |                        |                |
|           |                           |                                  | <i>bla</i> TEM      | <i>bla</i> CTX-M | <i>bla</i> OXA-1 | <i>bla</i> SHV |               |            |                 |                        |                |
| SD1,23    | <i>S. dysenteriae</i> (2) | TE, AM, AMC, CEC, S, BKC, P      | +                   | -                | -                | -              | +             | +          | P1              | 8.89, 4.07, 2.23, 1.26 | Raw cow milk   |
| SD2,14    | <i>S. dysenteriae</i> (2) | TE, AM, AMC, CEC, BKC, P         | +                   | -                | -                | -              | +             | +          | P1              | 8.89, 4.07, 2.23, 1.26 | Raw cow milk   |
| SD3,16    | <i>S. dysenteriae</i> (2) | TE, AMC, P                       | +                   | -                | -                | -              | +             | -          | P1              | 8.89, 4.07, 2.23, 1.26 | Raw cow milk   |
| SD4,24    | <i>S. dysenteriae</i> (2) | TE, AM, AMC, CEC, BKC, P         | +                   | -                | -                | -              | +             | +          | P3              | 30.80, 7.12            | Raw cow milk   |
| SD5,13    | <i>S. dysenteriae</i> (2) | TE, AM, AMC, CEC, BKC, P         | +                   | -                | -                | -              | +             | +          | P3              | 30.80, 7.12            | Raw cow milk   |
| SD6,15    | <i>S. dysenteriae</i> (2) | TE, AM, AMC, CEC, BKC, P         | +                   | -                | -                | -              | +             | +          | P2              | 27.51, 4.66, 2.36      | Kareish cheese |
| SD7,18    | <i>S. dysenteriae</i> (2) | TE, AM, AMC, CEC, CIP, C, BKC, P | +                   | -                | -                | -              | +             | +          | P3              | 30.80, 7.12            | Kareish cheese |
| SD8,17    | <i>S. dysenteriae</i> (2) | TE, AM, AMC, CEC, BKC, P         | +                   | -                | -                | -              | +             | +          | P4              | 33.617,2.677           | Kareish cheese |

|         |                           |                                    |   |   |   |   |   |   |    |                   |                |
|---------|---------------------------|------------------------------------|---|---|---|---|---|---|----|-------------------|----------------|
| SD9,20  | <i>S. dysenteriae</i> (2) | TE, AM, AMC, CEC, BKC, P           | + | - | - | - | + | + | P2 | 27.51, 4.66, 2.36 | Kareish cheese |
| SD10,19 | <i>S. dysenteriae</i> (2) | TE, AM, AMC, P                     | + | - | - | - | + | - | P2 | 27.51, 4.66, 2.36 | Kareish cheese |
| SD11,21 | <i>S. dysenteriae</i> (2) | TE, AM, AMC, P                     | + | - | - | - | + | - | P4 | 33.617,2.677      | Kareish cheese |
| SD12,22 | <i>S. dysenteriae</i> (2) | TE, AM, AMC, BKC, P                | + | - | - | - | + | + | P4 | 33.617,2.677      | Kareish cheese |
| SF1,7   | <i>S. flexneri</i> (2)    | TE, AM, AMC, CEC, CIP, C, BKC, P   | + | - | - | - | + | + | P5 | 18.59             | Raw milk       |
| SF2,8   | <i>S. flexneri</i> (2)    | TE, AM, AMC, CEC, CTX, CAZ, BKC, P | + | + | - | - | + | + | P6 | 23.28, 4.40, 2.23 | Raw milk       |
| SF3,12  | <i>S. flexneri</i> (2)    | TE, AM, CEC, CTX, CAZ, BKC, P      | + | + | - | - | + | + | P5 | 18.59             | Kareish cheese |
| SF4,10  | <i>S. flexneri</i> (2)    | TE, AM, CEC, CTX, CAZ, BKC, P      | + | + | - | - | + | + | P5 | 18.59             | Kareish cheese |
| SF5,11  | <i>S. flexneri</i> (2)    | TE, AM, AMC, BKC, P                | + | - | - | - | + | + | P6 | 23.28, 4.40, 2.23 | Kareish cheese |
| SF6,9   | <i>S. flexneri</i> (2)    | TE, AMC, BKC, P                    | + | - | - | - | + | + | P6 | 23.28, 4.40, 2.23 | Kareish cheese |
| SS1,6   | <i>S. sonnei</i> (2)      | TE, AM, AMC, CEC, CTX,             | + | + | - | - | + | + | P7 | 30.80, 1.41       | Raw cow milk   |

|       |                      |                                          |   |   |   |   |   |   |    |                |                |  |
|-------|----------------------|------------------------------------------|---|---|---|---|---|---|----|----------------|----------------|--|
|       |                      | CAZ, BKC, P                              |   |   |   |   |   |   |    |                |                |  |
| SS2,4 | <i>S. sonnei</i> (2) | TE, AM, AMC,<br>CEC, CTX,<br>CAZ, BKC, P | + | + | - | - | + | + | P7 | 30.80,<br>1.41 | Kareish cheese |  |
| SS3,5 | <i>S. sonnei</i> (2) | TE, AM, AMC,<br>CTX, CAZ,<br>BKC, P      | + | + | - | - | + | + | P7 | 30.80,<br>1.41 | Kareish cheese |  |
